# Supplementary material
Source: PubMed Central journal article supplement (PMC3138328)
Supplement: NIHMS227856-supplement-01.pdf [file NIHMS227856-supplement-01.pdf]

# THE LANCET

## **Supplementary webappendix**

This webappendix formed part of the original submission and has been peer reviewed. We post it as supplied by the authors.

Supplement to: May M, Boulle A, Phiri S, et al, for the leDEA Southern Africa and West Africa. Prognosis of patients with HIV-1 infection starting antiretroviral therapy in sub-Saharan Africa: a collaborative analysis of scale-up programmes. *Lancet* 2010; published online July 16. DOI:10.1016/S0140-6736(10)60666-6.

## Estimates from CD4 model:

### Cumulative mortality at 3, 6, and 12 months after starting combination antiretroviral therapy according to CD4 count, age, disease stage and weight.

#### a) Women

| Weight (kg)                          | Month | CD4 count (cells/ $\mu$ L) |                  |                  |                  |                  |
|--------------------------------------|-------|----------------------------|------------------|------------------|------------------|------------------|
|                                      |       | <25                        | 25-49            | 50-99            | 100-199          | $\geq$ 200       |
| <b>Age &lt;40 years</b>              |       |                            |                  |                  |                  |                  |
| <b>WHO stage I/II</b>                |       |                            |                  |                  |                  |                  |
| <45                                  | 3     | 7.8 (5.2-11.8)             | 5.8 (3.7- 9.0)   | 3.2 (2.0- 5.0)   | 2.1 ( 1.4- 3.3)  | 1.8 ( 1.1- 2.8)  |
|                                      | 6     | 10.1 ( 6.7-15.1)           | 7.7 ( 5.0-11.9)  | 4.5 (2.9- 7.0)   | 3.3 (2.1- 5.0)   | 2.7 ( 1.7- 4.3)  |
|                                      | 12    | 12.2 ( 8.1-18.0)           | 9.5 (6.2-14.4)   | 5.8 (3.7- 8.9)   | 4.4 (2.9- 6.7)   | 3.7 (2.4- 5.8)   |
| 45-49                                | 3     | 4.7 (3.1- 7.0)             | 3.5 (2.3- 5.3)   | 1.9 (1.2- 2.9)   | 1.3 (0.8- 1.9)   | 1.1 (0.7- 1.7)   |
|                                      | 6     | 6.1 (4.1- 9.1)             | 4.6 (3.1- 7.0)   | 2.7 (1.8- 4.1)   | 1.9 (1.3- 2.9)   | 1.6 (1.1- 2.5)   |
|                                      | 12    | 7.4 (5.0-10.9)             | 5.7 (3.8- 8.6)   | 3.5 (2.3- 5.2)   | 2.6 (1.8- 3.9)   | 2.2 (1.4- 3.4)   |
| 50-59                                | 3     | 3.2 (2.1- 4.7)             | 2.3 (1.5- 3.5)   | 1.3 (0.8- 1.9)   | 0.8 (0.6- 1.3)   | 0.7 (0.5- 1.1)   |
|                                      | 6     | 4.1 (2.8- 6.1)             | 3.1 (2.1- 4.7)   | 1.8 (1.2- 2.7)   | 1.3 (0.9- 1.9)   | 1.1 (0.7- 1.7)   |
|                                      | 12    | 5.0 (3.4- 7.3)             | 3.9 (2.6- 5.7)   | 2.3 (1.6- 3.5)   | 1.8 (1.2- 2.6)   | 1.5 (1.0- 2.2)   |
| $\geq$ 60                            | 3     | 1.9 (1.3- 2.9)             | 1.4 (0.9- 2.1)   | 0.8 (0.5- 1.2)   | 0.5 (0.3- 0.8)   | 0.4 (0.3- 0.7)   |
|                                      | 6     | 2.5 (1.7- 3.7)             | 1.9 (1.3- 2.9)   | 1.1 (0.7- 1.6)   | 0.8 (0.5- 1.2)   | 0.7 (0.4- 1.0)   |
|                                      | 12    | 3.0 (2.1- 4.5)             | 2.3 (1.6- 3.5)   | 1.4 (0.9- 2.1)   | 1.1 (0.7- 1.6)   | 0.9 (0.6- 1.4)   |
| <b>WHO stage III/IV</b>              |       |                            |                  |                  |                  |                  |
| <45                                  | 3     | 19.8 (16.4-23.9)           | 14.9 (11.8-18.8) | 8.3 (6.4-10.8)   | 5.7 (4.4- 7.3)   | 4.8 (3.6- 6.3)   |
|                                      | 6     | 25.2 (21.1-29.9)           | 19.6 (15.8-24.3) | 11.7 (9.2-14.8)  | 8.6 (6.8-10.9)   | 7.3 (5.5- 9.5)   |
|                                      | 12    | 29.7 (25.1-35.0)           | 23.7 (19.2-29.0) | 15.0 (11.9-18.7) | 11.5 (9.2-14.4)  | 9.8 (7.5-12.6)   |
| 45-49                                | 3     | 12.3 (10.0-14.9)           | 9.1 (7.2-11.5)   | 5.0 (3.9- 6.4)   | 3.4 (2.7- 4.3)   | 2.9 (2.2- 3.8)   |
|                                      | 6     | 15.8 (13.1-19.0)           | 12.1 (9.7-15.1)  | 7.1 (5.6- 8.9)   | 5.2 (4.2- 6.5)   | 4.4 (3.3- 5.7)   |
|                                      | 12    | 18.8 (15.7-22.5)           | 14.8 (12.0-18.2) | 9.1 (7.3-11.4)   | 7.0 (5.7- 8.6)   | 5.9 (4.5- 7.6)   |
| 50-59                                | 3     | 8.4 (6.9-10.1)             | 6.2 (4.9- 7.8)   | 3.4 (2.7- 4.3)   | 2.3 (1.9- 2.8)   | 1.9 (1.5- 2.5)   |
|                                      | 6     | 10.9 (9.1-13.0)            | 8.3 (6.7-10.2)   | 4.8 (3.9- 6.0)   | 3.5 (2.9- 4.3)   | 2.9 (2.3- 3.8)   |
|                                      | 12    | 13.0 (11.0-15.5)           | 10.1 (8.3-12.3)  | 6.2 (5.1- 7.6)   | 4.7 (3.9- 5.7)   | 4.0 (3.1- 5.1)   |
| $\geq$ 60                            | 3     | 5.1 (4.0- 6.5)             | 3.8 (2.9- 4.9)   | 2.1 (1.6- 2.7)   | 1.4 (1.1- 1.8)   | 1.2 (0.9- 1.6)   |
|                                      | 6     | 6.7 (5.3- 8.4)             | 5.1 (4.0- 6.5)   | 2.9 (2.3- 3.8)   | 2.1 (1.7- 2.7)   | 1.8 (1.3- 2.4)   |
|                                      | 12    | 8.1 (6.4-10.1)             | 6.2 (4.9- 7.9)   | 3.8 (3.0- 4.8)   | 2.9 (2.3- 3.6)   | 2.4 (1.8- 3.2)   |
| <b>Age <math>\geq</math>40 years</b> |       |                            |                  |                  |                  |                  |
| <b>WHO stage I/II</b>                |       |                            |                  |                  |                  |                  |
| <45                                  | 3     | 11.0 (7.2-16.6)            | 8.2 (5.2-12.7)   | 4.5 (2.8- 7.1)   | 3.0 (1.9- 4.7)   | 2.5 (1.6- 4.1)   |
|                                      | 6     | 14.2 (9.4-21.1)            | 10.9 (7.0-16.7)  | 6.4 (4.1- 9.9)   | 4.6 (3.0- 7.2)   | 3.9 (2.5- 6.1)   |
|                                      | 12    | 16.9 (11.3-25.0)           | 13.2 (8.6-20.1)  | 8.2 (5.3-12.6)   | 6.2 (4.0- 9.6)   | 5.3 (3.3- 8.2)   |
| 45-49                                | 3     | 6.7 (4.4-10.0)             | 4.9 (3.2- 7.6)   | 2.7 (1.7- 4.1)   | 1.8 (1.2- 2.8)   | 1.5 (1.0- 2.4)   |
|                                      | 6     | 8.6 (5.8-12.9)             | 6.6 (4.3-10.0)   | 3.8 (2.5- 5.8)   | 2.8 (1.8- 4.2)   | 2.3 (1.5- 3.6)   |
|                                      | 12    | 10.4 (7.0-15.4)            | 8.1 (5.3-12.2)   | 4.9 (3.2- 7.5)   | 3.7 (2.5- 5.6)   | 3.1 (2.0- 4.8)   |
| 50-59                                | 3     | 4.5 (3.0- 6.7)             | 3.3 (2.2- 5.0)   | 1.8 (1.2- 2.7)   | 1.2 (0.8- 1.8)   | 1.0 (0.7- 1.6)   |
|                                      | 6     | 5.9 (3.9- 8.7)             | 4.5 (2.9- 6.7)   | 2.6 (1.7- 3.9)   | 1.9 (1.2- 2.8)   | 1.6 (1.0- 2.4)   |
|                                      | 12    | 7.1 (4.8-10.5)             | 5.5 (3.6- 8.2)   | 3.3 (2.2- 5.0)   | 2.5 (1.7- 3.7)   | 2.1 (1.4- 3.2)   |
| $\geq$ 60                            | 3     | 2.7 (1.8- 4.1)             | 2.0 (1.3- 3.1)   | 1.1 (0.7- 1.7)   | 0.7 (0.5- 1.1)   | 0.6 (0.4- 0.9)   |
|                                      | 6     | 3.6 (2.4- 5.4)             | 2.7 (1.8- 4.1)   | 1.6 (1.0- 2.4)   | 1.1 (0.8- 1.7)   | 0.9 (0.6- 1.4)   |
|                                      | 12    | 4.3 (2.9- 6.5)             | 3.3 (2.2- 5.0)   | 2.0 (1.3- 3.0)   | 1.5 (1.0- 2.3)   | 1.3 (0.8- 1.9)   |
| <b>WHO stage III/IV</b>              |       |                            |                  |                  |                  |                  |
| <45                                  | 3     | 27.1 (22.2-32.8)           | 20.7 (16.2-26.1) | 11.7 (9.0-15.2)  | 8.0 (6.2-10.4)   | 6.8 (5.1- 9.0)   |
|                                      | 6     | 34.0 (28.3-40.5)           | 26.9 (21.5-33.3) | 16.4 (12.8-20.8) | 12.1 (9.5-15.3)  | 10.2 (7.8-13.4)  |
|                                      | 12    | 39.6 (33.3-46.7)           | 32.0 (25.9-39.2) | 20.7 (16.4-25.9) | 16.1 (12.7-20.2) | 13.7 (10.5-17.7) |
| 45-49                                | 3     | 17.1 (13.8-21.0)           | 12.8 (10.0-16.3) | 7.1 (5.5- 9.2)   | 4.8 (3.8- 6.2)   | 4.1 (3.1- 5.4)   |
|                                      | 6     | 21.8 (17.8-26.5)           | 16.9 (13.4-21.1) | 10.0 (7.9-12.7)  | 7.3 (5.8- 9.2)   | 6.2 (4.7- 8.1)   |
|                                      | 12    | 25.8 (21.3-31.1)           | 20.4 (16.4-25.2) | 12.8 (10.2-16.0) | 9.8 (7.9-12.2)   | 8.3 (6.4-10.8)   |
| 50-59                                | 3     | 11.8 (9.5-14.5)            | 8.8 (6.9-11.1)   | 4.8 (3.8- 6.2)   | 3.3 (2.6- 4.1)   | 2.7 (2.1- 3.6)   |
|                                      | 6     | 15.2 (12.4-18.5)           | 11.7 (9.3-14.5)  | 6.8 (5.4- 8.5)   | 5.0 (4.0- 6.1)   | 4.2 (3.2- 5.4)   |
|                                      | 12    | 18.1 (14.9-21.9)           | 14.2 (11.4-17.5) | 8.8 (7.1-10.9)   | 6.7 (5.5- 8.2)   | 5.6 (4.4- 7.3)   |
| $\geq$ 60                            | 3     | 7.3 (5.6- 9.3)             | 5.4 (4.1- 7.1)   | 2.9 (2.2- 3.9)   | 2.0 (1.5- 2.5)   | 1.7 (1.2- 2.2)   |
|                                      | 6     | 9.4 (7.4-12.0)             | 7.2 (5.5- 9.3)   | 4.2 (3.2- 5.4)   | 3.0 (2.4- 3.8)   | 2.5 (1.9- 3.4)   |
|                                      | 12    | 11.3 (8.9-14.3)            | 8.8 (6.8-11.3)   | 5.4 (4.2- 6.9)   | 4.1 (3.2- 5.1)   | 3.4 (2.6- 4.5)   |

## b) Men

| Weight (kg)                          | Month | CD4 count (cells/ $\mu$ L) |                  |                  |                  |                  |
|--------------------------------------|-------|----------------------------|------------------|------------------|------------------|------------------|
|                                      |       | <25                        | 25-49            | 50-99            | 100-199          | $\geq$ 200       |
| <b>Age &lt;40 years</b>              |       |                            |                  |                  |                  |                  |
| <b>WHO stage I/II</b>                |       |                            |                  |                  |                  |                  |
| <45                                  | 3     | 11.3 (7.2-17.5)            | 8.4 (5.2-13.4)   | 4.6 (2.8-7.5)    | 3.1 (1.9-5.1)    | 2.6 (1.6-4.3)    |
|                                      | 6     | 14.6 (9.4-22.2)            | 11.2 (7.0-17.6)  | 6.5 (4.0-10.5)   | 4.8 (2.9-7.6)    | 4.0 (2.4-6.5)    |
|                                      | 12    | 17.4 (11.3-26.3)           | 13.6 (8.6-21.2)  | 8.4 (5.2-13.4)   | 6.4 (4.0-10.2)   | 5.4 (3.3-8.8)    |
| 45-49                                | 3     | 6.8 (4.5-10.4)             | 5.1 (3.2-7.9)    | 2.8 (1.7-4.3)    | 1.9 (1.2-2.9)    | 1.6 (1.0-2.5)    |
|                                      | 6     | 8.9 (5.8-13.4)             | 6.8 (4.4-10.5)   | 3.9 (2.5-6.1)    | 2.8 (1.8-4.4)    | 2.4 (1.5-3.8)    |
|                                      | 12    | 10.7 (7.1-16.0)            | 8.3 (5.4-12.7)   | 5.1 (3.3-7.8)    | 3.8 (2.5-5.9)    | 3.2 (2.0-5.1)    |
| 50-59                                | 3     | 4.6 (3.1-6.9)              | 3.4 (2.2-5.2)    | 1.9 (1.2-2.8)    | 1.2 (0.8-1.9)    | 1.0 (0.7-1.6)    |
|                                      | 6     | 6.0 (4.1-9.0)              | 4.6 (3.0-6.9)    | 2.6 (1.7-4.0)    | 1.9 (1.3-2.9)    | 1.6 (1.0-2.5)    |
|                                      | 12    | 7.3 (4.9-10.7)             | 5.6 (3.7-8.5)    | 3.4 (2.3-5.2)    | 2.6 (1.7-3.9)    | 2.2 (1.4-3.3)    |
| $\geq$ 60                            | 3     | 2.8 (1.9-4.2)              | 2.1 (1.3-3.2)    | 1.1 (0.7-1.7)    | 0.8 (0.5-1.1)    | 0.6 (0.4-1.0)    |
|                                      | 6     | 3.7 (2.5-5.5)              | 2.8 (1.8-4.2)    | 1.6 (1.0-2.4)    | 1.2 (0.8-1.7)    | 1.0 (0.6-1.5)    |
|                                      | 12    | 4.5 (3.0-6.6)              | 3.4 (2.3-5.2)    | 2.1 (1.4-3.1)    | 1.6 (1.0-2.3)    | 1.3 (0.9-2.0)    |
| <b>WHO stage III/IV</b>              |       |                            |                  |                  |                  |                  |
| <45                                  | 3     | 27.8 (22.2-34.4)           | 21.2 (16.2-27.5) | 12.0 (8.9-16.1)  | 8.3 (6.1-11.1)   | 7.0 (5.0-9.6)    |
|                                      | 6     | 34.8 (28.3-42.4)           | 27.6 (21.5-35.0) | 16.8 (12.7-22.0) | 12.4 (9.3-16.4)  | 10.5 (7.7-14.3)  |
|                                      | 12    | 40.5 (33.2-48.8)           | 32.8 (25.9-41.1) | 21.3 (16.3-27.5) | 16.5 (12.5-21.6) | 14.0 (10.4-18.8) |
| 45-49                                | 3     | 17.5 (14.2-21.6)           | 13.1 (10.2-16.9) | 7.3 (5.6-9.6)    | 5.0 (3.8-6.5)    | 4.2 (3.1-5.7)    |
|                                      | 6     | 22.4 (18.3-27.2)           | 17.4 (13.7-21.8) | 10.3 (8.0-13.2)  | 7.5 (5.9-9.7)    | 6.4 (4.8-8.5)    |
|                                      | 12    | 26.5 (21.8-31.9)           | 21.0 (16.7-26.1) | 13.2 (10.4-16.7) | 10.1 (7.9-12.9)  | 8.6 (6.4-11.3)   |
| 50-59                                | 3     | 12.1 (10.0-14.6)           | 9.0 (7.2-11.3)   | 5.0 (3.9-6.3)    | 3.4 (2.7-4.2)    | 2.8 (2.1-3.7)    |
|                                      | 6     | 15.6 (13.1-18.5)           | 12.0 (9.7-14.7)  | 7.0 (5.6-8.7)    | 5.1 (4.1-6.3)    | 4.3 (3.3-5.6)    |
|                                      | 12    | 18.6 (15.7-22.0)           | 14.6 (12.0-17.7) | 9.0 (7.3-11.1)   | 6.9 (5.6-8.4)    | 5.8 (4.5-7.5)    |
| $\geq$ 60                            | 3     | 7.5 (6.0-9.4)              | 5.5 (4.3-7.1)    | 3.0 (2.3-3.9)    | 2.0 (1.6-2.6)    | 1.7 (1.3-2.3)    |
|                                      | 6     | 9.7 (7.8-12.0)             | 7.4 (5.8-9.4)    | 4.3 (3.3-5.5)    | 3.1 (2.5-3.9)    | 2.6 (2.0-3.5)    |
|                                      | 12    | 11.7 (9.4-14.4)            | 9.0 (7.2-11.4)   | 5.5 (4.4-7.0)    | 4.2 (3.4-5.3)    | 3.5 (2.7-4.7)    |
| <b>Age <math>\geq</math>40 years</b> |       |                            |                  |                  |                  |                  |
| <b>WHO stage I/II</b>                |       |                            |                  |                  |                  |                  |
| <45                                  | 3     | 15.8 (10.1-24.1)           | 11.8 (7.3-18.6)  | 6.5 (4.0-10.6)   | 4.4 (2.7-7.2)    | 3.7 (2.3-6.1)    |
|                                      | 6     | 20.2 (13.1-30.3)           | 15.6 (9.8-24.2)  | 9.2 (5.7-14.7)   | 6.7 (4.2-10.8)   | 5.7 (3.5-9.2)    |
|                                      | 12    | 23.9 (15.7-35.5)           | 18.9 (12.0-28.9) | 11.8 (7.4-18.6)  | 9.1 (5.7-14.3)   | 7.6 (4.7-12.3)   |
| 45-49                                | 3     | 9.6 (6.3-14.6)             | 7.1 (4.6-11.1)   | 3.9 (2.5-6.2)    | 2.6 (1.7-4.1)    | 2.2 (1.4-3.5)    |
|                                      | 6     | 12.5 (8.2-18.7)            | 9.5 (6.2-14.6)   | 5.6 (3.6-8.6)    | 4.0 (2.6-6.3)    | 3.4 (2.1-5.4)    |
|                                      | 12    | 14.9 (9.9-22.2)            | 11.6 (7.6-17.7)  | 7.2 (4.6-11.0)   | 5.5 (3.5-8.4)    | 4.6 (2.9-7.2)    |
| 50-59                                | 3     | 6.6 (4.4-9.8)              | 4.8 (3.2-7.4)    | 2.6 (1.7-4.1)    | 1.8 (1.2-2.7)    | 1.5 (1.0-2.3)    |
|                                      | 6     | 8.5 (5.7-12.6)             | 6.5 (4.3-9.8)    | 3.8 (2.5-5.7)    | 2.7 (1.8-4.1)    | 2.3 (1.5-3.5)    |
|                                      | 12    | 10.3 (6.9-15.1)            | 8.0 (5.3-11.9)   | 4.9 (3.2-7.3)    | 3.7 (2.5-5.5)    | 3.1 (2.0-4.8)    |
| $\geq$ 60                            | 3     | 4.0 (2.7-6.0)              | 2.9 (1.9-4.5)    | 1.6 (1.0-2.5)    | 1.1 (0.7-1.6)    | 0.9 (0.6-1.4)    |
|                                      | 6     | 5.2 (3.5-7.8)              | 4.0 (2.6-6.0)    | 2.3 (1.5-3.5)    | 1.6 (1.1-2.5)    | 1.4 (0.9-2.1)    |
|                                      | 12    | 6.3 (4.2-9.4)              | 4.9 (3.2-7.4)    | 3.0 (2.0-4.5)    | 2.2 (1.5-3.3)    | 1.9 (1.2-2.9)    |
| <b>WHO stage III/IV</b>              |       |                            |                  |                  |                  |                  |
| <45                                  | 3     | 37.3 (30.1-45.4)           | 28.9 (22.3-36.9) | 16.8 (12.5-22.2) | 11.6 (8.6-15.5)  | 9.8 (7.1-13.4)   |
|                                      | 6     | 45.8 (37.7-54.7)           | 36.9 (29.2-46.0) | 23.1 (17.7-29.9) | 17.3 (13.1-22.6) | 14.7 (10.9-19.7) |
|                                      | 12    | 52.5 (43.8-61.7)           | 43.4 (34.8-53.1) | 29.0 (22.5-36.8) | 22.7 (17.5-29.3) | 19.5 (14.6-25.7) |
| 45-49                                | 3     | 24.1 (19.6-29.4)           | 18.3 (14.3-23.2) | 10.3 (7.9-13.4)  | 7.0 (5.4-9.1)    | 5.9 (4.4-7.9)    |
|                                      | 6     | 30.4 (25.0-36.6)           | 23.9 (19.0-29.7) | 14.4 (11.3-18.3) | 10.6 (8.3-13.5)  | 9.0 (6.8-11.8)   |
|                                      | 12    | 35.6 (29.6-42.4)           | 28.6 (23.0-35.1) | 18.3 (14.5-23.0) | 14.2 (11.2-17.8) | 12.0 (9.1-15.7)  |
| 50-59                                | 3     | 16.9 (13.9-20.3)           | 12.6 (10.1-15.8) | 7.0 (5.5-8.9)    | 4.8 (3.8-6.0)    | 4.0 (3.1-5.2)    |
|                                      | 6     | 21.5 (18.0-25.6)           | 16.7 (13.6-20.4) | 9.9 (8.0-12.3)   | 7.2 (5.9-8.9)    | 6.1 (4.7-7.9)    |
|                                      | 12    | 25.5 (21.5-30.1)           | 20.2 (16.6-24.4) | 12.7 (10.3-15.5) | 9.7 (7.9-11.9)   | 8.2 (6.4-10.5)   |
| $\geq$ 60                            | 3     | 10.5 (8.4-13.1)            | 7.8 (6.0-10.0)   | 4.3 (3.3-5.6)    | 2.9 (2.3-3.7)    | 2.4 (1.8-3.2)    |
|                                      | 6     | 13.6 (10.9-16.8)           | 10.4 (8.2-13.2)  | 6.1 (4.8-7.7)    | 4.4 (3.5-5.6)    | 3.7 (2.8-4.9)    |
|                                      | 12    | 16.2 (13.2-19.9)           | 12.7 (10.1-15.9) | 7.8 (6.2-9.9)    | 6.0 (4.8-7.4)    | 5.0 (3.8-6.6)    |

Estimates from total lymphocyte and haemoglobin model:

Cumulative mortality at 3, 6, and 12 months after starting combination antiretroviral therapy according to degree of anaemia, total lymphocyte count, weight, age and clinical stage.

a) Women

| Age<40 years         |       | Severe anaemia (Hb <5 mmol/L) |                                 |                              | Moderate anaemia (Hb 5 to <6.2 mmol/L) |                                 |                              | Mild or no anaemia (Hb ≥6.2 mmol/L) |                                 |                              |
|----------------------|-------|-------------------------------|---------------------------------|------------------------------|----------------------------------------|---------------------------------|------------------------------|-------------------------------------|---------------------------------|------------------------------|
| WHO I or II          |       | Total lymphocyte count<800    | Total lymphocyte count 800-1199 | Total lymphocyte count ≥1200 | Total lymphocyte count<800             | Total lymphocyte count 800-1199 | Total lymphocyte count ≥1200 | Total lymphocyte count<800          | Total lymphocyte count 800-1199 | Total lymphocyte count ≥1200 |
| Wt (kg)              | month |                               |                                 |                              |                                        |                                 |                              |                                     |                                 |                              |
| <45                  | 3     | 10.0 (6.1-16.4)               | 6.5 (4.0-10.5)                  | 4.9 (3.1- 7.8)               | 6.4 (3.6-11.2)                         | 4.1 (2.5- 6.7)                  | 3.1 (1.9- 5.0)               | 4.3 (2.2- 8.3)                      | 2.8 (1.6- 4.8)                  | 2.1 (1.2- 3.6)               |
|                      | 6     | 12.4 (7.6-19.8)               | 8.4 (5.3-13.3)                  | 6.4 (4.0- 9.9)               | 8.2 (4.8-14.0)                         | 5.6 (3.5- 8.8)                  | 4.2 (2.6- 6.6)               | 5.5 (2.9-10.4)                      | 3.7 (2.2- 6.3)                  | 2.8 (1.6- 4.8)               |
|                      | 12    | 12.7 (7.9-20.1)               | 9.2 (5.8-14.3)                  | 6.9 (4.4-10.7)               | 9.2 (5.5-15.2)                         | 6.6 (4.2-10.3)                  | 5.0 (3.2- 7.8)               | 6.2 (3.4-11.3)                      | 4.5 (2.7- 7.4)                  | 3.3 (2.0- 5.6)               |
| 45-49                | 3     | 5.0 (3.1- 8.2)                | 3.2 (2.0- 5.2)                  | 2.4 (1.5- 3.8)               | 3.2 (1.9- 5.4)                         | 2.0 (1.3- 3.2)                  | 1.5 (1.0- 2.4)               | 2.1 (1.1- 3.9)                      | 1.3 (0.8- 2.2)                  | 1.0 (0.6- 1.7)               |
|                      | 6     | 6.7 (4.1-10.8)                | 4.5 (2.8- 7.2)                  | 3.4 (2.2- 5.3)               | 4.4 (2.6- 7.3)                         | 3.0 (1.9- 4.6)                  | 2.2 (1.4- 3.4)               | 3.0 (1.6- 5.3)                      | 2.0 (1.2- 3.2)                  | 1.5 (0.9- 2.4)               |
|                      | 12    | 8.0 (5.0-12.7)                | 5.7 (3.6- 9.1)                  | 4.3 (2.7- 6.7)               | 5.8 (3.5- 9.3)                         | 4.1 (2.7- 6.4)                  | 3.1 (2.0- 4.7)               | 3.9 (2.2- 6.8)                      | 2.8 (1.7- 4.4)                  | 2.1 (1.3- 3.3)               |
| 50-59                | 3     | 3.3 (2.0- 5.6)                | 2.1 (1.3- 3.5)                  | 1.6 (1.0- 2.6)               | 2.1 (1.2- 3.6)                         | 1.3 (0.8- 2.1)                  | 1.0 (0.6- 1.6)               | 1.4 (0.8- 2.6)                      | 0.9 (0.5- 1.5)                  | 0.7 (0.4- 1.1)               |
|                      | 6     | 4.5 (2.7- 7.5)                | 3.0 (1.9- 4.9)                  | 2.3 (1.4- 3.6)               | 2.9 (1.7- 5.0)                         | 2.0 (1.3- 3.1)                  | 1.5 (1.0- 2.3)               | 2.0 (1.1- 3.6)                      | 1.3 (0.8- 2.1)                  | 1.0 (0.6- 1.6)               |
|                      | 12    | 5.4 (3.2- 8.8)                | 3.8 (2.4- 6.2)                  | 2.9 (1.8- 4.5)               | 3.9 (2.3- 6.4)                         | 2.7 (1.8- 4.3)                  | 2.1 (1.3- 3.1)               | 2.6 (1.4- 4.6)                      | 1.8 (1.1- 2.9)                  | 1.4 (0.9- 2.2)               |
| ≥60                  | 3     | 2.1 (1.2- 3.6)                | 1.4 (0.8- 2.3)                  | 1.0 (0.6- 1.6)               | 1.3 (0.8- 2.3)                         | 0.8 (0.5- 1.4)                  | 0.6 (0.4- 1.0)               | 0.9 (0.5- 1.7)                      | 0.6 (0.3- 0.9)                  | 0.4 (0.3- 0.7)               |
|                      | 6     | 2.9 (1.7- 4.8)                | 1.9 (1.2- 3.1)                  | 1.4 (0.9- 2.3)               | 1.9 (1.1- 3.2)                         | 1.2 (0.8- 2.0)                  | 0.9 (0.6- 1.5)               | 1.2 (0.7- 2.3)                      | 0.8 (0.5- 1.4)                  | 0.6 (0.4- 1.0)               |
|                      | 12    | 3.4 (2.0- 5.7)                | 2.4 (1.5- 4.0)                  | 1.8 (1.1- 2.9)               | 2.4 (1.5- 4.1)                         | 1.7 (1.1- 2.7)                  | 1.3 (0.8- 2.0)               | 1.6 (0.9- 2.9)                      | 1.2 (0.7- 1.9)                  | 0.9 (0.5- 1.4)               |
| <b>WHO III or IV</b> |       |                               |                                 |                              |                                        |                                 |                              |                                     |                                 |                              |
| <45                  | 3     | 26.9 (20.3-35.1)              | 18.1 (13.4-24.1)                | 13.8 (10.4-18.1)             | 17.8 (12.4-25.2)                       | 11.7 (8.8-15.4)                 | 8.9 (6.7-11.6)               | 12.2 (7.5-19.5)                     | 7.9 (5.5-11.4)                  | 6.0 (4.1- 8.7)               |
|                      | 6     | 32.3 (25.0-41.1)              | 22.9 (17.6-29.7)                | 17.7 (13.8-22.5)             | 22.4 (16.1-30.7)                       | 15.6 (12.0-20.1)                | 11.9 (9.2-15.3)              | 15.5 (9.8-24.0)                     | 10.7 (7.5-15.0)                 | 8.1 (5.6-11.5)               |
|                      | 12    | 33.1 (26.1-41.4)              | 24.8 (19.3-31.5)                | 19.1 (15.1-24.0)             | 24.9 (18.6-33.0)                       | 18.4 (14.4-23.2)                | 14.0 (11.1-17.7)             | 17.3 (11.4-25.9)                    | 12.6 (9.1-17.3)                 | 9.6 (6.8-13.4)               |
| 45-49                | 3     | 14.1 (10.4-18.9)              | 9.2 (6.6-12.8)                  | 6.9 (5.1- 9.4)               | 9.1 (6.4-12.7)                         | 5.9 (4.4- 7.7)                  | 4.4 (3.4- 5.7)               | 6.1 (3.9- 9.4)                      | 3.9 (2.8- 5.4)                  | 2.9 (2.1- 4.1)               |
|                      | 6     | 18.6 (14.0-24.4)              | 12.8 (9.4-17.4)                 | 9.7 (7.4-12.8)               | 12.5 (9.1-17.0)                        | 8.5 (6.6-11.1)                  | 6.4 (5.1- 8.2)               | 8.5 (5.6-12.7)                      | 5.8 (4.2- 7.8)                  | 4.3 (3.2- 5.9)               |
|                      | 12    | 21.8 (16.7-28.2)              | 16.0 (11.8-21.4)                | 12.2 (9.3-15.9)              | 16.1 (12.1-21.2)                       | 11.7 (9.1-14.9)                 | 8.8 (7.0-11.1)               | 11.0 (7.5-15.9)                     | 7.9 (5.9-10.6)                  | 6.0 (4.4- 8.0)               |
| 50-59                | 3     | 9.6 (6.8-13.3)                | 6.2 (4.4- 8.8)                  | 4.7 (3.4- 6.3)               | 6.1 (4.2- 8.8)                         | 3.9 (3.0- 5.2)                  | 2.9 (2.3- 3.7)               | 4.1 (2.6- 6.4)                      | 2.6 (1.9- 3.6)                  | 2.0 (1.4- 2.7)               |
|                      | 6     | 12.7 (9.2-17.4)               | 8.7 (6.3-12.0)                  | 6.6 (4.9- 8.7)               | 8.5 (6.0-11.9)                         | 5.7 (4.4- 7.4)                  | 4.3 (3.4- 5.4)               | 5.7 (3.7- 8.7)                      | 3.9 (2.9- 5.2)                  | 2.9 (2.2- 3.9)               |
|                      | 12    | 15.0 (11.1-20.2)              | 10.9 (7.9-14.9)                 | 8.2 (6.2-10.9)               | 11.0 (8.1-14.8)                        | 7.9 (6.1-10.1)                  | 5.9 (4.8- 7.4)               | 7.4 (5.0-11.0)                      | 5.3 (4.0- 7.1)                  | 4.0 (3.0- 5.3)               |
| ≥60                  | 3     | 6.1 (4.2- 8.9)                | 3.9 (2.7- 5.8)                  | 3.0 (2.1- 4.2)               | 3.9 (2.6- 5.8)                         | 2.5 (1.8- 3.4)                  | 1.9 (1.4- 2.5)               | 2.6 (1.6- 4.2)                      | 1.7 (1.2- 2.3)                  | 1.2 (0.9- 1.7)               |
|                      | 6     | 8.2 (5.7-11.7)                | 5.6 (3.8- 8.0)                  | 4.2 (3.0- 5.8)               | 5.4 (3.7- 7.9)                         | 3.6 (2.7- 4.9)                  | 2.7 (2.0- 3.6)               | 3.6 (2.3- 5.7)                      | 2.4 (1.8- 3.4)                  | 1.8 (1.3- 2.5)               |
|                      | 12    | 9.7 (6.8-13.7)                | 7.0 (4.9-10.0)                  | 5.3 (3.7- 7.4)               | 7.0 (5.0- 9.9)                         | 5.0 (3.7- 6.8)                  | 3.8 (2.9- 5.0)               | 4.7 (3.1- 7.1)                      | 3.4 (2.5- 4.6)                  | 2.5 (1.8- 3.5)               |

a) Women (continued)

| Age ≥40 years        |         | Severe anaemia (Hb <5 mmol/L) |                  |                  | Moderate anaemia (Hb 5 to <6.2 mmol/L) |                  |                  | Mild or no anaemia (Hb ≥6.2 mmol/L) |                  |                  |                 |
|----------------------|---------|-------------------------------|------------------|------------------|----------------------------------------|------------------|------------------|-------------------------------------|------------------|------------------|-----------------|
| WHO I or II          | Wt (kg) | month                         | Total lymphocyte | Total lymphocyte | Total lymphocyte                       | Total lymphocyte | Total lymphocyte | Total lymphocyte                    | Total lymphocyte | Total lymphocyte |                 |
|                      |         |                               | count<800        | count 800-1199   | count ≥1200                            | count<800        | count 800-1199   | count ≥1200                         | count<800        | count 800-1199   | count ≥1200     |
| <45                  | 3       | 6                             | 13.4 (8.1-21.7)  | 8.8 (5.4-14.0)   | 6.6 (4.1-10.4)                         | 8.6 (4.9-14.9)   | 5.6 (3.4-9.0)    | 4.2 (2.6-6.7)                       | 5.8 (3.0-11.1)   | 3.7 (2.1-6.5)    | 2.8 (1.6-4.9)   |
|                      |         |                               | 16.4 (10.1-26.1) | 11.3 (7.1-17.7)  | 8.5 (5.5-13.3)                         | 11.0 (6.4-18.6)  | 7.5 (4.7-11.9)   | 5.6 (3.6-8.9)                       | 7.5 (3.9-13.9)   | 5.1 (3.0-8.6)    | 3.8 (2.2-6.5)   |
|                      |         |                               | 16.9 (10.5-26.4) | 12.3 (7.8-19.0)  | 9.3 (6.0-14.3)                         | 12.4 (7.4-20.3)  | 8.9 (5.7-13.9)   | 6.7 (4.3-10.4)                      | 8.4 (4.6-15.2)   | 6.0 (3.6-10.0)   | 4.5 (2.7-7.6)   |
| 45-49                | 3       | 6                             | 6.7 (4.1-11.0)   | 4.3 (2.7-7.1)    | 3.3 (2.1-5.1)                          | 4.3 (2.5-7.3)    | 2.7 (1.7-4.4)    | 2.1 (1.3-3.2)                       | 2.9 (1.5-5.3)    | 1.8 (1.1-3.0)    | 1.4 (0.8-2.2)   |
|                      |         |                               | 9.0 (5.6-14.5)   | 6.1 (3.8-9.8)    | 4.6 (2.9-7.1)                          | 6.0 (3.6-9.9)    | 4.0 (2.6-6.3)    | 3.0 (2.0-4.6)                       | 4.0 (2.2-7.2)    | 2.7 (1.6-4.4)    | 2.0 (1.2-3.3)   |
|                      |         |                               | 10.7 (6.6-17.0)  | 7.7 (4.8-12.2)   | 5.8 (3.7-9.0)                          | 7.7 (4.7-12.5)   | 5.5 (3.6-8.6)    | 4.2 (2.7-6.4)                       | 5.2 (3.0-9.1)    | 3.7 (2.3-6.0)    | 2.8 (1.7-4.5)   |
| 50-59                | 3       | 6                             | 4.5 (2.7-7.6)    | 2.9 (1.8-4.8)    | 2.2 (1.4-3.5)                          | 2.9 (1.6-4.9)    | 1.8 (1.1-2.9)    | 1.4 (0.9-2.1)                       | 1.9 (1.0-3.5)    | 1.2 (0.7-2.0)    | 0.9 (0.6-1.5)   |
|                      |         |                               | 6.1 (3.6-10.1)   | 4.1 (2.5-6.6)    | 3.1 (1.9-4.8)                          | 4.0 (2.3-6.8)    | 2.7 (1.7-4.2)    | 2.0 (1.3-3.1)                       | 2.7 (1.5-4.9)    | 1.8 (1.1-2.9)    | 1.3 (0.8-2.2)   |
|                      |         |                               | 7.2 (4.4-11.8)   | 5.2 (3.2-8.3)    | 3.9 (2.5-6.1)                          | 5.2 (3.1-8.6)    | 3.7 (2.4-5.8)    | 2.8 (1.8-4.2)                       | 3.5 (2.0-6.2)    | 2.5 (1.5-4.0)    | 1.9 (1.2-3.0)   |
| ≥60                  | 3       | 6                             | 2.9 (1.7-4.9)    | 1.8 (1.1-3.1)    | 1.4 (0.8-2.2)                          | 1.8 (1.0-3.2)    | 1.2 (0.7-1.8)    | 0.9 (0.5-1.4)                       | 1.2 (0.6-2.2)    | 0.8 (0.5-1.3)    | 0.6 (0.3-0.9)   |
|                      |         |                               | 3.9 (2.3-6.5)    | 2.6 (1.6-4.3)    | 1.9 (1.2-3.1)                          | 2.5 (1.5-4.3)    | 1.7 (1.1-2.7)    | 1.3 (0.8-2.0)                       | 1.7 (0.9-3.1)    | 1.1 (0.7-1.8)    | 0.8 (0.5-1.4)   |
|                      |         |                               | 4.6 (2.7-7.7)    | 3.3 (2.0-5.4)    | 2.5 (1.5-3.9)                          | 3.3 (2.0-5.5)    | 2.4 (1.5-3.7)    | 1.8 (1.1-2.7)                       | 2.2 (1.2-3.9)    | 1.6 (1.0-2.5)    | 1.2 (0.7-1.9)   |
| <b>WHO III or IV</b> |         |                               |                  |                  |                                        |                  |                  |                                     |                  |                  |                 |
| <45                  | 3       | 6                             | 34.7 (26.3-44.7) | 23.7 (17.6-31.5) | 18.3 (14.0-23.7)                       | 23.4 (16.3-32.8) | 15.6 (11.7-20.6) | 11.9 (9.1-15.4)                     | 16.2 (10.0-25.7) | 10.6 (7.3-15.3)  | 8.0 (5.5-11.6)  |
|                      |         |                               | 41.2 (32.1-51.7) | 29.8 (22.9-38.3) | 23.2 (18.3-29.2)                       | 29.2 (21.1-39.6) | 20.6 (15.8-26.5) | 15.8 (12.3-20.2)                    | 20.5 (13.1-31.3) | 14.2 (10.0-19.9) | 10.8 (7.6-15.2) |
|                      |         |                               | 42.1 (33.3-52.1) | 32.1 (25.0-40.5) | 25.0 (19.9-31.2)                       | 32.3 (24.1-42.4) | 24.1 (18.9-30.5) | 18.6 (14.7-23.3)                    | 22.8 (15.1-33.6) | 16.8 (12.1-23.0) | 12.8 (9.2-17.7) |
| 45-49                | 3       | 6                             | 18.7 (13.8-24.9) | 12.3 (8.8-17.1)  | 9.3 (7.0-12.5)                         | 12.1 (8.5-17.0)  | 7.9 (5.9-10.5)   | 5.9 (4.6-7.6)                       | 8.2 (5.3-12.7)   | 5.3 (3.8-7.4)    | 4.0 (2.9-5.4)   |
|                      |         |                               | 24.4 (18.4-31.8) | 17.0 (12.4-23.1) | 13.0 (9.9-16.9)                        | 16.6 (12.1-22.6) | 11.4 (8.7-14.9)  | 8.6 (6.8-10.9)                      | 11.4 (7.5-17.0)  | 7.7 (5.7-10.5)   | 5.8 (4.3-7.8)   |
|                      |         |                               | 28.4 (21.7-36.6) | 21.1 (15.6-28.1) | 16.2 (12.4-20.9)                       | 21.2 (15.9-28.0) | 15.5 (12.0-20.0) | 11.8 (9.4-14.7)                     | 14.6 (10.0-21.2) | 10.6 (7.9-14.2)  | 8.0 (6.0-10.6)  |
| 50-59                | 3       | 6                             | 12.8 (9.1-17.9)  | 8.3 (5.8-11.8)   | 6.3 (4.6-8.5)                          | 8.2 (5.6-11.8)   | 5.3 (4.0-7.1)    | 4.0 (3.1-5.1)                       | 5.5 (3.5-8.7)    | 3.6 (2.6-4.9)    | 2.7 (2.0-3.6)   |
|                      |         |                               | 16.9 (12.2-23.1) | 11.6 (8.3-16.1)  | 8.8 (6.6-11.6)                         | 11.3 (8.0-15.9)  | 7.7 (5.9-10.1)   | 5.8 (4.6-7.3)                       | 7.7 (5.0-11.7)   | 5.2 (3.8-7.1)    | 3.9 (2.9-5.2)   |
|                      |         |                               | 19.9 (14.6-26.7) | 14.5 (10.5-19.8) | 11.0 (8.4-14.5)                        | 14.6 (10.7-19.8) | 10.6 (8.1-13.7)  | 8.0 (6.4-9.9)                       | 10.0 (6.7-14.7)  | 7.2 (5.3-9.6)    | 5.4 (4.1-7.1)   |
| ≥60                  | 3       | 6                             | 8.2 (5.6-12.0)   | 5.3 (3.6-7.8)    | 4.0 (2.8-5.7)                          | 5.2 (3.5-7.8)    | 3.4 (2.4-4.6)    | 2.5 (1.9-3.4)                       | 3.5 (2.2-5.6)    | 2.2 (1.6-3.2)    | 1.7 (1.2-2.3)   |
|                      |         |                               | 11.0 (7.6-15.7)  | 7.5 (5.2-10.7)   | 5.6 (4.0-7.8)                          | 7.3 (5.0-10.6)   | 4.9 (3.6-6.7)    | 3.7 (2.8-4.9)                       | 4.9 (3.1-7.6)    | 3.3 (2.4-4.6)    | 2.5 (1.8-3.4)   |
|                      |         |                               | 13.0 (9.1-18.3)  | 9.4 (6.5-13.4)   | 7.1 (5.1-9.8)                          | 9.5 (6.7-13.3)   | 6.8 (5.0-9.1)    | 5.1 (3.9-6.7)                       | 6.4 (4.2-9.6)    | 4.6 (3.3-6.2)    | 3.4 (2.5-4.6)   |

b) Men

| Weight                  | Month | Severe anaemia (Hb <5 mmol/L)      |                  |                  | Moderate anaemia (Hb 5 to <6.8 mmol/L) |                  |                  | Mild or no anaemia (Hb ≥6.8 mmol/L) |                  |                  |
|-------------------------|-------|------------------------------------|------------------|------------------|----------------------------------------|------------------|------------------|-------------------------------------|------------------|------------------|
|                         |       | Total lymphocyte count (cells/ μL) |                  |                  | Total lymphocyte count (cells/ μL)     |                  |                  | Total lymphocyte count (cells/ μL)  |                  |                  |
|                         |       | <800                               | 800-1199         | ≥1200            | <800                                   | 800-1199         | ≥1200            | <800                                | 800-1199         | ≥1200            |
| <b>Age &lt;40 years</b> |       |                                    |                  |                  |                                        |                  |                  |                                     |                  |                  |
| <b>WHO stage I/II</b>   |       |                                    |                  |                  |                                        |                  |                  |                                     |                  |                  |
| <45 kg                  | 3     | 16.1 (9.6-26.4)                    | 10.6 (6.3-17.4)  | 8.0 (4.8-13.1)   | 10.4 (5.9-18.2)                        | 6.8 (4.1-11.1)   | 5.1 (3.1- 8.4)   | 7.0 (3.6-13.7)                      | 4.5 (2.5- 8.0)   | 3.4 (1.9- 6.1)   |
|                         | 6     | 19.7 (11.9-31.5)                   | 13.6 (8.3-21.8)  | 10.3 (6.3-16.6)  | 13.3 (7.7-22.5)                        | 9.1 (5.6-14.6)   | 6.9 (4.2-11.1)   | 9.0 (4.7-17.0)                      | 6.1 (3.5-10.6)   | 4.6 (2.6- 8.1)   |
|                         | 12    | 20.2 (12.4-31.9)                   | 14.8 (9.2-23.3)  | 11.2 (6.9-17.9)  | 14.9 (8.8-24.4)                        | 10.8 (6.7-17.0)  | 8.1 (5.0-13.0)   | 10.1 (5.4-18.5)                     | 7.3 (4.2-12.4)   | 5.5 (3.1- 9.5)   |
| 45-49 kg                | 3     | 8.2 (4.9-13.4)                     | 5.3 (3.2- 8.7)   | 4.0 (2.4- 6.5)   | 5.2 (3.0- 8.8)                         | 3.3 (2.1- 5.4)   | 2.5 (1.6- 4.0)   | 3.5 (1.9- 6.4)                      | 2.2 (1.3- 3.8)   | 1.7 (1.0- 2.8)   |
|                         | 6     | 10.9 (6.6-17.6)                    | 7.4 (4.5-12.0)   | 5.6 (3.5- 8.9)   | 7.2 (4.3-12.0)                         | 4.9 (3.1- 7.7)   | 3.7 (2.3- 5.8)   | 4.9 (2.7- 8.8)                      | 3.3 (2.0- 5.4)   | 2.5 (1.5- 4.1)   |
|                         | 12    | 12.9 (7.9-20.6)                    | 9.3 (5.7-15.0)   | 7.0 (4.4-11.2)   | 9.4 (5.7-15.2)                         | 6.7 (4.3-10.5)   | 5.1 (3.2- 7.9)   | 6.3 (3.6-11.1)                      | 4.5 (2.8- 7.4)   | 3.4 (2.0- 5.6)   |
| 50-59 kg                | 3     | 5.5 (3.2- 9.3)                     | 3.5 (2.1- 5.9)   | 2.6 (1.6- 4.3)   | 3.5 (2.0- 6.0)                         | 2.2 (1.4- 3.5)   | 1.7 (1.1- 2.6)   | 2.3 (1.2- 4.3)                      | 1.5 (0.9- 2.5)   | 1.1 (0.7- 1.8)   |
|                         | 6     | 7.4 (4.4-12.2)                     | 5.0 (3.0- 8.1)   | 3.7 (2.3- 6.0)   | 4.8 (2.9- 8.2)                         | 3.3 (2.1- 5.1)   | 2.4 (1.6- 3.8)   | 3.2 (1.8- 5.9)                      | 2.2 (1.3- 3.6)   | 1.6 (1.0- 2.7)   |
|                         | 12    | 8.7 (5.3-14.3)                     | 6.3 (3.8-10.2)   | 4.7 (2.9- 7.5)   | 6.3 (3.8-10.4)                         | 4.5 (2.9- 7.0)   | 3.4 (2.2- 5.2)   | 4.2 (2.4- 7.5)                      | 3.0 (1.9- 4.9)   | 2.3 (1.4- 3.7)   |
| ≥60                     | 3     | 3.5 (2.0- 6.0)                     | 2.2 (1.3- 3.8)   | 1.7 (1.0- 2.8)   | 2.2 (1.3- 3.8)                         | 1.4 (0.9- 2.3)   | 1.0 (0.7- 1.7)   | 1.5 (0.8- 2.7)                      | 0.9 (0.6- 1.6)   | 0.7 (0.4- 1.2)   |
|                         | 6     | 4.7 (2.8- 7.9)                     | 3.2 (1.9- 5.2)   | 2.4 (1.4- 3.9)   | 3.1 (1.8- 5.2)                         | 2.1 (1.3- 3.3)   | 1.5 (1.0- 2.4)   | 2.1 (1.1- 3.8)                      | 1.4 (0.8- 2.3)   | 1.0 (0.6- 1.7)   |
|                         | 12    | 5.6 (3.3- 9.3)                     | 4.0 (2.4- 6.6)   | 3.0 (1.8- 4.9)   | 4.0 (2.4- 6.7)                         | 2.9 (1.8- 4.5)   | 2.1 (1.4- 3.4)   | 2.7 (1.5- 4.8)                      | 1.9 (1.2- 3.1)   | 1.4 (0.9- 2.3)   |
| <b>WHO stage III/IV</b> |       |                                    |                  |                  |                                        |                  |                  |                                     |                  |                  |
| <45                     | 3     | 40.5 (30.5-52.4)                   | 28.2 (20.5-38.0) | 21.8 (16.0-29.4) | 27.7 (19.4-38.7)                       | 18.7 (13.8-25.0) | 14.3 (10.6-19.2) | 19.4 (11.9-30.8)                    | 12.8 (8.7-18.8)  | 9.7 (6.5-14.5)   |
|                         | 6     | 47.7 (36.9-59.8)                   | 35.1 (26.4-45.7) | 27.6 (20.8-36.0) | 34.4 (24.9-46.2)                       | 24.5 (18.6-31.9) | 18.9 (14.3-24.9) | 24.4 (15.5-37.2)                    | 17.1 (11.8-24.3) | 13.0 (8.8-19.0)  |
|                         | 12    | 48.7 (38.3-60.1)                   | 37.6 (28.8-48.1) | 29.7 (22.7-38.2) | 37.9 (28.4-49.2)                       | 28.6 (22.2-36.4) | 22.2 (17.1-28.6) | 27.1 (17.9-39.8)                    | 20.1 (14.2-27.9) | 15.4 (10.7-21.9) |
| 45-49                   | 3     | 22.3 (16.5-29.8)                   | 14.8 (10.5-20.8) | 11.3 (8.1-15.5)  | 14.6 (10.4-20.2)                       | 9.5 (7.2-12.7)   | 7.2 (5.5- 9.4)   | 9.9 (6.4-15.3)                      | 6.4 (4.6- 9.0)   | 4.8 (3.4- 6.8)   |
|                         | 6     | 28.9 (21.9-37.6)                   | 20.4 (14.7-27.8) | 15.6 (11.6-20.9) | 19.9 (14.6-26.7)                       | 13.8 (10.5-17.9) | 10.4 (8.1-13.4)  | 13.7 (9.1-20.4)                     | 9.4 (6.8-12.9)   | 7.1 (5.1- 9.8)   |
|                         | 12    | 33.5 (25.7-42.8)                   | 25.1 (18.5-33.5) | 19.4 (14.5-25.6) | 25.2 (19.2-32.8)                       | 18.6 (14.5-23.8) | 14.2 (11.2-18.0) | 17.6 (12.1-25.3)                    | 12.8 (9.4-17.2)  | 9.7 (7.1-13.2)   |
| 50-59                   | 3     | 15.4 (11.0-21.2)                   | 10.1 (7.1-14.3)  | 7.6 (5.5-10.5)   | 9.9 (7.0-14.0)                         | 6.4 (4.9- 8.4)   | 4.8 (3.8- 6.2)   | 6.7 (4.3-10.4)                      | 4.3 (3.1- 5.9)   | 3.2 (2.4- 4.4)   |
|                         | 6     | 20.2 (14.8-27.3)                   | 14.0 (10.1-19.3) | 10.6 (7.9-14.2)  | 13.7 (9.9-18.7)                        | 9.3 (7.2-12.0)   | 7.1 (5.6- 8.8)   | 9.3 (6.1-14.0)                      | 6.3 (4.7- 8.5)   | 4.7 (3.5- 6.4)   |
|                         | 12    | 23.7 (17.7-31.3)                   | 17.4 (12.7-23.7) | 13.3 (9.9-17.7)  | 17.5 (13.2-23.2)                       | 12.8 (10.0-16.2) | 9.7 (7.8-12.0)   | 12.0 (8.2-17.5)                     | 8.7 (6.5-11.5)   | 6.5 (4.9- 8.7)   |
| ≥60                     | 3     | 10.0 (6.9-14.3)                    | 6.5 (4.4- 9.4)   | 4.9 (3.4- 7.0)   | 6.4 (4.3- 9.3)                         | 4.1 (3.0- 5.5)   | 3.1 (2.3- 4.1)   | 4.3 (2.7- 6.8)                      | 2.7 (2.0- 3.8)   | 2.0 (1.5- 2.9)   |
|                         | 6     | 13.2 (9.3-18.6)                    | 9.1 (6.3-12.9)   | 6.8 (4.8- 9.6)   | 8.8 (6.2-12.5)                         | 6.0 (4.5- 8.0)   | 4.5 (3.4- 5.9)   | 6.0 (3.8- 9.2)                      | 4.0 (2.9- 5.5)   | 3.0 (2.2- 4.2)   |
|                         | 12    | 15.6 (11.2-21.6)                   | 11.3 (7.9-16.0)  | 8.6 (6.1-12.0)   | 11.4 (8.3-15.6)                        | 8.2 (6.2-10.8)   | 6.2 (4.7- 8.1)   | 7.7 (5.2-11.5)                      | 5.5 (4.1- 7.5)   | 4.2 (3.0- 5.7)   |

**b) Men (continued)**

| Weight                  | Month | Severe anaemia (Hb <5 mmol/L)      |                  |                  | Moderate anaemia (Hb 5 to <6.8 mmol/L) |                  |                  | Mild or no anaemia (Hb ≥6.8 mmol/L) |                  |                  |
|-------------------------|-------|------------------------------------|------------------|------------------|----------------------------------------|------------------|------------------|-------------------------------------|------------------|------------------|
|                         |       | Total lymphocyte count (cells/ μL) |                  |                  | Total lymphocyte count (cells/ μL)     |                  |                  | Total lymphocyte count (cells/ μL)  |                  |                  |
|                         |       | <800                               | 800-1199         | ≥1200            | <800                                   | 800-1199         | ≥1200            | <800                                | 800-1199         | ≥1200            |
| <b>Age ≥40 years</b>    |       |                                    |                  |                  |                                        |                  |                  |                                     |                  |                  |
| <b>WHO stage I/II</b>   |       |                                    |                  |                  |                                        |                  |                  |                                     |                  |                  |
| <45                     | 3     | 21.3 (12.8-34.1)                   | 14.1 (8.5-22.8)  | 10.7 (6.6-17.3)  | 13.9 (7.9-23.9)                        | 9.1 (5.5-14.8)   | 6.8 (4.2-11.1)   | 9.5 (4.8-18.1)                      | 6.1 (3.5-10.7)   | 4.6 (2.6-8.1)    |
|                         | 6     | 25.8 (15.9-40.2)                   | 18.1 (11.2-28.4) | 13.8 (8.6-21.7)  | 17.6 (10.3-29.3)                       | 12.1 (7.5-19.3)  | 9.2 (5.7-14.7)   | 12.1 (6.3-22.4)                     | 8.2 (4.7-14.1)   | 6.2 (3.5-10.8)   |
|                         | 12    | 26.4 (16.5-40.7)                   | 19.5 (12.2-30.3) | 14.9 (9.4-23.3)  | 19.7 (11.8-31.7)                       | 14.4 (9.0-22.4)  | 10.9 (6.8-17.1)  | 13.5 (7.3-24.2)                     | 9.8 (5.7-16.4)   | 7.4 (4.3-12.6)   |
| 45-49                   | 3     | 10.9 (6.6-17.8)                    | 7.1 (4.3-11.7)   | 5.4 (3.3-8.6)    | 7.0 (4.1-11.8)                         | 4.5 (2.8-7.2)    | 3.4 (2.1-5.3)    | 4.7 (2.5-8.6)                       | 3.0 (1.8-5.0)    | 2.3 (1.4-3.8)    |
|                         | 6     | 14.5 (8.9-23.1)                    | 9.9 (6.1-16.0)   | 7.5 (4.7-11.9)   | 9.7 (5.8-16.0)                         | 6.6 (4.2-10.3)   | 5.0 (3.2-7.7)    | 6.6 (3.6-11.7)                      | 4.4 (2.7-7.3)    | 3.3 (2.0-5.5)    |
|                         | 12    | 17.1 (10.6-26.9)                   | 12.4 (7.7-19.7)  | 9.4 (5.9-14.8)   | 12.5 (7.7-20.0)                        | 9.0 (5.8-14.0)   | 6.8 (4.4-10.5)   | 8.5 (4.8-14.8)                      | 6.1 (3.7-9.9)    | 4.6 (2.8-7.5)    |
| 50-59                   | 3     | 7.4 (4.4-12.4)                     | 4.8 (2.9-7.9)    | 3.6 (2.2-5.8)    | 4.7 (2.7-8.1)                          | 3.0 (1.9-4.8)    | 2.3 (1.4-3.5)    | 3.1 (1.7-5.8)                       | 2.0 (1.2-3.3)    | 1.5 (0.9-2.5)    |
|                         | 6     | 9.9 (5.9-16.2)                     | 6.7 (4.1-10.9)   | 5.0 (3.2-8.0)    | 6.5 (3.9-11.0)                         | 4.4 (2.8-6.9)    | 3.3 (2.1-5.1)    | 4.4 (2.4-8.0)                       | 3.0 (1.8-4.8)    | 2.2 (1.4-3.6)    |
|                         | 12    | 11.7 (7.1-18.9)                    | 8.4 (5.2-13.6)   | 6.4 (4.0-10.0)   | 8.5 (5.1-13.8)                         | 6.1 (3.9-9.4)    | 4.6 (3.0-7.0)    | 5.7 (3.2-10.1)                      | 4.1 (2.5-6.6)    | 3.1 (1.9-4.9)    |
| ≥60                     | 3     | 4.7 (2.8-8.0)                      | 3.0 (1.8-5.0)    | 2.3 (1.4-3.7)    | 3.0 (1.7-5.1)                          | 1.9 (1.2-3.0)    | 1.4 (0.9-2.2)    | 2.0 (1.1-3.7)                       | 1.3 (0.8-2.1)    | 0.9 (0.6-1.6)    |
|                         | 6     | 6.3 (3.8-10.6)                     | 4.3 (2.6-7.0)    | 3.2 (2.0-5.1)    | 4.2 (2.4-7.0)                          | 2.8 (1.8-4.4)    | 2.1 (1.3-3.3)    | 2.8 (1.5-5.0)                       | 1.9 (1.1-3.0)    | 1.4 (0.9-2.3)    |
|                         | 12    | 7.5 (4.5-12.4)                     | 5.4 (3.3-8.8)    | 4.0 (2.5-6.5)    | 5.4 (3.3-8.9)                          | 3.9 (2.5-6.0)    | 2.9 (1.9-4.5)    | 3.6 (2.1-6.4)                       | 2.6 (1.6-4.2)    | 1.9 (1.2-3.1)    |
| <b>WHO stage III/IV</b> |       |                                    |                  |                  |                                        |                  |                  |                                     |                  |                  |
| <45                     | 3     | 50.7 (39.0-63.5)                   | 36.2 (26.8-47.7) | 28.5 (21.3-37.4) | 35.7 (25.4-48.7)                       | 24.5 (18.4-32.3) | 18.9 (14.2-24.9) | 25.4 (15.9-39.3)                    | 17.0 (11.7-24.6) | 13.0 (8.8-19.0)  |
|                         | 6     | 58.6 (46.6-71.0)                   | 44.5 (34.1-56.4) | 35.5 (27.5-45.1) | 43.6 (32.2-57.0)                       | 31.8 (24.5-40.7) | 24.8 (19.1-31.9) | 31.7 (20.5-46.8)                    | 22.5 (15.8-31.4) | 17.3 (11.9-24.6) |
|                         | 12    | 59.6 (48.2-71.4)                   | 47.4 (37.1-58.9) | 38.0 (29.8-47.6) | 47.6 (36.5-60.2)                       | 36.8 (28.9-46.0) | 28.9 (22.7-36.4) | 34.9 (23.5-49.8)                    | 26.2 (18.9-35.8) | 20.3 (14.4-28.3) |
| 45-49                   | 3     | 29.0 (21.7-38.1)                   | 19.6 (14.0-27.1) | 15.0 (11.1-20.2) | 19.3 (13.9-26.5)                       | 12.8 (9.6-16.8)  | 9.7 (7.5-12.4)   | 13.3 (8.6-20.1)                     | 8.7 (6.2-12.0)   | 6.5 (4.7-9.0)    |
|                         | 6     | 37.1 (28.5-47.2)                   | 26.6 (19.5-35.6) | 20.6 (15.6-26.9) | 26.0 (19.4-34.4)                       | 18.2 (14.1-23.5) | 13.9 (11.0-17.5) | 18.2 (12.2-26.6)                    | 12.5 (9.2-17.0)  | 9.5 (7.0-12.8)   |
|                         | 12    | 42.6 (33.3-53.2)                   | 32.5 (24.3-42.5) | 25.4 (19.4-32.8) | 32.7 (25.2-41.7)                       | 24.4 (19.2-30.9) | 18.8 (15.1-23.4) | 23.1 (16.1-32.6)                    | 17.0 (12.7-22.6) | 13.0 (9.7-17.3)  |
| 50-59                   | 3     | 20.3 (14.7-27.7)                   | 13.5 (9.5-18.9)  | 10.2 (7.5-13.8)  | 13.2 (9.4-18.6)                        | 8.6 (6.6-11.3)   | 6.5 (5.2-8.1)    | 9.0 (5.8-13.9)                      | 5.8 (4.3-8.0)    | 4.4 (3.3-5.9)    |
|                         | 6     | 26.4 (19.6-35.1)                   | 18.6 (13.4-25.3) | 14.2 (10.7-18.6) | 18.1 (13.2-24.6)                       | 12.5 (9.7-16.0)  | 9.5 (7.7-11.7)   | 12.4 (8.2-18.6)                     | 8.5 (6.3-11.4)   | 6.4 (4.8-8.5)    |
|                         | 12    | 30.8 (23.2-40.1)                   | 22.9 (16.9-30.7) | 17.6 (13.4-23.0) | 23.1 (17.4-30.2)                       | 16.9 (13.4-21.4) | 12.9 (10.6-15.8) | 16.0 (11.0-23.0)                    | 11.6 (8.7-15.3)  | 8.8 (6.7-11.5)   |
| ≥60                     | 3     | 13.3 (9.3-18.8)                    | 8.7 (6.0-12.5)   | 6.5 (4.6-9.2)    | 8.5 (5.9-12.4)                         | 5.5 (4.1-7.4)    | 4.1 (3.2-5.4)    | 5.8 (3.7-9.0)                       | 3.7 (2.7-5.1)    | 2.8 (2.0-3.8)    |
|                         | 6     | 17.6 (12.5-24.3)                   | 12.1 (8.5-17.1)  | 9.2 (6.6-12.6)   | 11.8 (8.3-16.6)                        | 8.0 (6.1-10.6)   | 6.1 (4.7-7.8)    | 8.0 (5.2-12.2)                      | 5.4 (4.0-7.3)    | 4.1 (3.0-5.5)    |
|                         | 12    | 20.6 (14.9-28.1)                   | 15.1 (10.7-21.1) | 11.5 (8.3-15.7)  | 15.2 (11.1-20.6)                       | 11.0 (8.4-14.4)  | 8.3 (6.5-10.7)   | 10.4 (7.0-15.2)                     | 7.5 (5.6-10.0)   | 5.6 (4.2-7.5)    |

**Mortality hazard ratios for CD4 model and total lymphocyte and haemoglobin model for those remaining in care or for all patients (including patients lost to follow-up), based on imputed datasets or based on complete case analysis.**

|                                          | Those remaining in care                |                           | All patients                    |                           |
|------------------------------------------|----------------------------------------|---------------------------|---------------------------------|---------------------------|
|                                          | CD4 model                              |                           |                                 |                           |
|                                          | Multiple imputation<br>N=10,331        | Complete case<br>N = 7876 | Multiple imputation<br>N=11,153 | Complete case<br>N = 8515 |
| Age ≥ 40 years (v. < 40 years)           | 1.43 (1.23-1.66)                       | 1.33 (1.14-1.55)          | 1.42 (1.23-1.64)                | 1.32 (1.13-1.54)          |
| Female (v. male)                         | 0.68 (0.58-0.79)                       | 0.67 (0.58-0.79)          | 0.71 (0.61-0.82)                | 0.71 (0.60-0.83)          |
| Advanced stage (v. less adv)             | 2.72 (1.87-3.95)                       | 2.63 (1.73-4.01)          | 2.76 (1.91-3.99)                | 2.63 (1.73-4.01)          |
| CD4 count (cells/μL)                     |                                        |                           |                                 |                           |
| <25                                      | 1                                      | 1                         | 1                               | 1                         |
| 25-49                                    | 0.76 (0.62-0.94)                       | 0.80 (0.65-0.99)          | 0.77 (0.63-0.94)                | 0.80 (0.65-0.99)          |
| 50-99                                    | 0.46 (0.38-0.57)                       | 0.48 (0.39-0.60)          | 0.47 (0.38-0.57)                | 0.49 (0.39-0.60)          |
| 100-199                                  | 0.35 (0.28-0.42)                       | 0.37 (0.30-0.45)          | 0.36 (0.29-0.43)                | 0.38 (0.31-0.46)          |
| ≥200                                     | 0.29 (0.22-0.38)                       | 0.28 (0.22-0.37)          | 0.29 (0.23-0.38)                | 0.28 (0.22-0.37)          |
| Weight (kg)                              |                                        |                           |                                 |                           |
| <45                                      | 1                                      | 1                         | 1                               | 1                         |
| 45-49≥                                   | 0.59 (0.48-0.72)                       | 0.57 (0.46-0.71)          | 0.62 (0.51-0.76)                | 0.60 (0.49-0.74)          |
| 50-59                                    | 0.40 (0.33-0.48)                       | 0.37 (0.30-0.45)          | 0.43 (0.36-0.52)                | 0.40 (0.33-0.49)          |
| ≥60                                      | 0.24 (0.19-0.30)                       | 0.22 (0.18-0.28)          | 0.27 (0.22-0.33)                | 0.25 (0.20-0.31)          |
|                                          | Total lymphocyte and haemoglobin model |                           |                                 |                           |
|                                          | Multiple imputation<br>N=10331         | Complete case<br>N = 4085 | Multiple imputation<br>N=11153  | Complete case<br>N = 4369 |
| Age 40 years (v. <40 years)              | 1.36 (1.12-1.64)                       | 1.19 (0.95-1.49)          | 1.36 (1.14-1.62)                | 1.17 (0.94-1.47)          |
| Female (v. male)                         | 0.60 (0.50-0.73)                       | 0.59 (0.47-0.75)          | 0.63 (0.53-0.75)                | 0.62 (0.50-0.79)          |
| Advanced stage (v. less adv)             | 2.96 (1.83-4.78)                       | 2.24 (1.37-3.68)          | 3.05 (1.95-4.76)                | 2.29 (1.39-3.75)          |
| Weight (kg)                              |                                        |                           |                                 |                           |
| <45                                      | 1                                      | 1                         | 1                               | 1                         |
| 45-49                                    | 0.61 (0.47-0.79)                       | 0.45 (0.33-0.61)          | 0.64 (0.50-0.82)                | 0.47 (0.35-0.64)          |
| 50-59                                    | 0.40 (0.32-0.51)                       | 0.33 (0.25-0.44)          | 0.44 (0.35-0.55)                | 0.36 (0.27-0.47)          |
| ≥60                                      | 0.25 (0.19-0.33)                       | 0.22 (0.16-0.30)          | 0.28 (0.22-0.37)                | 0.24 (0.17-0.33)          |
| Total lymphocyte count (cells/μL)        |                                        |                           |                                 |                           |
| 0-799                                    | 1                                      | 1                         | 1                               | 1                         |
| 800-1199                                 | 0.71 (0.55-0.91)                       | 0.52 (0.39-0.70)          | 0.71 (0.56-0.91)                | 0.56 (0.42-0.75)          |
| ≥1200                                    | 0.53 (0.43-0.65)                       | 0.44 (0.34-0.55)          | 0.55 (0.45-0.67)                | 0.46 (0.36-0.58)          |
| Categories of anaemia Haemoglobin (g/dl) |                                        |                           |                                 |                           |
| Severe (<8)                              | 1                                      | 1                         | 1                               | 1                         |
| Moderate (m 8-10.9, f 8-9.9)             | 0.71 (0.56-0.91)                       | 0.72 (0.55-0.95)          | 0.73 (0.57-0.94)                | 0.77 (0.58-1.02)          |
| Mild or none (m ≥11, f ≥10)              | 0.47 (0.37-0.61)                       | 0.50 (0.37-0.67)          | 0.48 (0.37-0.62)                | 0.55 (0.41-0.74)          |



### **Method of imputation of missing data**

We used imputation by chained equations method implemented using the ice command in Stata.<sup>1,2</sup> Prognostic variables were imputed conditional on other correlated variables. All prediction equations included cohort, log age at start of ART, sex, square root transformed CD4 count, indicators for dead (and lost in sensitivity analysis) and the Nelson-Aalen cumulative hazard function of time (cumhazt). Other variables were included in equations if they were associated with the dependent variable. Weight was interval censored to ensure that imputed values were within the range in the available data. Continuous variables that were right skewed were log transformed in the imputation (age, weight, HIV-1 RNA). Continuous variables were imputed from the posterior predicted distribution except for total lymphocyte count, which was imputed by matching as this variable was not Normally distributed. The interaction between haemoglobin and sex was included in the imputation since females had lower haemoglobin levels. 25 imputed datasets were created. Comparing the distributions of variables in the imputed data with those in the observed data, log total lymphocyte count (p difference = 0.62) and log weight (p = 0.78) were similar, haemoglobin was slightly lower (mean 10.21 (95% CI 9.90-10.52) v. 10.52 (10.47-10.57) p = 0.049), there was a higher proportion of advanced disease stage (95 v. 85%) and a higher proportion with HIV1-RNA  $\geq 5$  (55 v. 50%). The prognostic model was fitted using the imputed datasets and estimated coefficients combined by averaging. Appropriate standard errors were calculated using the within and between imputation standard errors of the estimates using Rubin's rules.<sup>3</sup>

## Equations in multiple imputation command `ice` in Stata

```
local complete = "cohort1 cohort2 cohort3 lnage sqrtcd4 female lost dead cumhazt"  
ice `complete' ///  
    stage lnweight lwt uwt ///  
    haem haemXfemale lnlymp rna_cat rna1 rna2 ///  
    using mi_data ///  
    ,m(25) orderasis genmiss(M) seed(101) replace ///  
    match(lnlymp) ///  
    passive(haemXfemale: haem*female \ ///  
            rna1: rna_cat==1 \ rna2: rna_cat==2) ///  
    substitute(rna_cat: rna1 rna2) ///  
    int(lnweight: lwt uwt) ///  
    eq(stage: `complete' haem haemXfemale lnlymp lnweight rna1 rna2, ///  
        lnweight: `complete' stage haem haemXfemale lnlymp rna1 rna2, ///  
        haem: `complete' stage lnlymp lnweight rna1 rna2, ///  
        lnlymp: `complete' stage haem haemXfemale lnweight rna1 rna2, ///  
        rna_cat: `complete' stage haem haemXfemale lnweight )
```

1. Royston P. Multiple imputation of missing values. *Stata Journal* 2004;4(3):227-41.
2. Royston P. Multiple imputation of missing values: further update of ice, with an emphasis on interval censoring. *Stata Journal* 2009;7:445-64.
3. Rubin DB. *Multiple imputation for Nonresponse in Surveys*. New York: John Wiley & Sons; 1987.
